# Supplementary material
Source: publisher figshare collection journal article supplement (https://diabetesjournals.figshare.com/ndownloader/files/25355306)
Supplement: Supplementary file 1 [file 25355306]

## Sheet: Up-regulation
# Fold Change cut-off: 2.0 # P-value cut-off: 0.05 # Condition pairs: db/db_vs_db/m # Column A: probeID it represents probe name. # Column B: P-value, P-value calculated from unpaired t-test. # Column C: FDR, FDR is calculated from Benjamini Hochberg FDR. # Column D: FC (abs), the absolute ratio (no log scale) of normalized intensities between two conditions. # Column E: Regulation, it depicts wh…
db/db_vs_db/m 2.0 fold up regulated CircRNAs
	P-value and FDR		Fold change and Regulation		Annotations
probeID	P-value	FDR	FC (abs)	Regulation	circRNA	Alias	circRNA_type	chrom	strand	txStart	txEnd	GeneSymbol
ASCRMP000054	0.000768972	0.0261866	8.6554	up	mmu_circRNA_000551	mm9_circ_000551	exonic	chr7	+	16883126	16883510	Dact3
ASCRMP000155	0.0200839	0.0981152	2.26409	up	mmu_circRNA_001617	mm9_circ_001617	antisense	chr13	-	3564569	3564661	Gdi2
ASCRMP000166	0.0251899	0.109067	3.6782	up	mmu_circRNA_001726	mm9_circ_001726	exonic	chr9	-	112176094	112187766	Arpp21
ASCRMP000217	0.00143088	0.0270952	2.4222	up	mmu_circRNA_002258	mm9_circ_002258	exonic	chr9	+	65113258	65114441	Igdcc4
ASCRMP000261	0.00042008	0.0235406	12.659	up	mmu_circRNA_002722	mm9_circ_002722	exonic	chr17	+	45033237	45048392	Supt3
ASCRMP000286	0.00100813	0.0266893	3.0164	up	mmu_circRNA_002989	mm9_circ_002989	intronic	chr17	+	39845153	39845215	Gm26917
ASCRMP000310	0.0147643	0.0882551	3.47767	up	mmu_circRNA_003160	mm9_circ_003160	intronic	chr17	-	39845455	39845565	XLOC_010800
ASCRMP000339	0.0161781	0.090642	3.75783	up	mmu_circRNA_003473	mm9_circ_003473	exonic	chr14	+	17963060	17963321	Thrb
ASCRMP000345	0.00360926	0.041094	4.91018	up	mmu_circRNA_003540	mm9_circ_003540	exonic	chr3	+	32861770	32865966	Usp13
ASCRMP000347	0.0300545	0.117419	2.23839	up	mmu_circRNA_003551	mm9_circ_003551	intragenic	chr4	+	43492855	43493023	Ccdc107
ASCRMP000360	0.0478226	0.152742	2.42564	up	mmu_circRNA_003736	mm9_circ_003736	exonic	chr13	-	119381675	119396976	Nnt
ASCRMP000465	0.0135058	0.0869271	4.254	up	mmu_circRNA_004806	mm9_circ_004806	exonic	chr7	+	125760300	125770703	D430042O09Rik
ASCRMP000466	0.013102	0.0863001	2.2552	up	mmu_circRNA_004859	mm9_circ_004859	exonic	chr2	+	35643887	35661625	Dab2ip
ASCRMP000480	0.0116911	0.0831949	5.26719	up	mmu_circRNA_004976	mm9_circ_004976	antisense	chr17	-	39847774	39847851	Rn45s
ASCRMP000508	0.00995885	0.0770807	7.23894	up	mmu_circRNA_005234	mm9_circ_005234	exonic	chr12	+	73181783	73219142	Mnat1
ASCRMP000529	0.0219414	0.101242	2.05529	up	mmu_circRNA_005444	mm9_circ_005444	intragenic	chr17	-	39845363	39845455	XLOC_010800
ASCRMP000548	0.00189982	0.0329164	3.82123	up	mmu_circRNA_005658	mm9_circ_005658	antisense	chr6	-	125121606	125121675	Chd4
ASCRMP000560	0.00312363	0.0407413	2.06854	up	mmu_circRNA_005797	mm9_circ_005797	exonic	chr8	+	91468316	91485278	Fto
ASCRMP000570	0.0276351	0.112264	2.87146	up	mmu_circRNA_005891	mm9_circ_005891	antisense	chr2	+	84602158	84602218	Ctnnd1
ASCRMP000584	0.0248186	0.10809	3.41109	up	mmu_circRNA_006032	mm9_circ_006032	intronic	chr17	-	39845455	39845525	XLOC_010800
ASCRMP000592	0.0239496	0.106043	3.23764	up	mmu_circRNA_006120	mm9_circ_006120	exonic	chr10	-	81487679	81488358	Ncln
ASCRMP000605	0.000164094	0.0162491	18.4211	up	mmu_circRNA_006254	mm9_circ_006254	exonic	chr2	-	33064003	33105023	Garnl3
ASCRMP000660	0.006519	0.058378	2.77491	up	mmu_circRNA_006863	mm9_circ_006863	antisense	chr11	-	75494149	75494231	Prpf8
ASCRMP000681	0.0150973	0.0882551	3.55298	up	mmu_circRNA_007085	mm9_circ_007085	intragenic	chr14	+	50807612	50807694	BC116202
ASCRMP000738	0.0122817	0.0863001	2.15546	up	mmu_circRNA_007599	mm9_circ_007599	intragenic	chr1	-	131053858	131053922	Mapkapk2
ASCRMP000758	0.0345244	0.126802	2.87662	up	mmu_circRNA_007768	mm9_circ_007768	intragenic	chr4	-	43492847	43493045	Rmrp
ASCRMP000765	0.0062275	0.0564013	4.43667	up	mmu_circRNA_007819	mm9_circ_007819	exonic	chr5	-	140261497	140303697	Mad1l1
ASCRMP000772	0.000277425	0.0201007	2.5341	up	mmu_circRNA_007883	mm9_circ_007883	exonic	chr7	-	132759388	132779385	Fam53b
ASCRMP000792	0.00101099	0.0266893	5.88041	up	mmu_circRNA_008147	mm9_circ_008147	exonic	chr12	+	3237284	3238112	Rab10os
ASCRMP000799	0.00682287	0.0596198	2.22741	up	mmu_circRNA_008244	mm9_circ_008244	exonic	chr15	+	30619221	30683470	Ctnnd2
ASCRMP000827	0.00270268	0.0371386	3.38885	up	mmu_circRNA_008488	mm9_circ_008488	exonic	chr12	-	51772273	51772705	Hectd1
ASCRMP000828	0.00339974	0.0410102	2.44315	up	mmu_circRNA_008494	mm9_circ_008494	antisense	chr7	+	28370403	28370513	Plekhg2
ASCRMP000837	0.00681953	0.0596198	2.10989	up	mmu_circRNA_008640	mm9_circ_008640	exonic	chr6	+	55460156	55461614	Adcyap1r1
ASCRMP000860	0.00966643	0.0762787	2.00185	up	mmu_circRNA_008885	mm9_circ_008885	exonic	chr1	-	92148255	92148494	Hdac4
ASCRMP000885	0.00127251	0.0266893	2.19658	up	mmu_circRNA_009119	mm9_circ_009119	antisense	chr11	+	11933260	11933326	Grb10
ASCRMP000906	0.00124593	0.0266893	4.39896	up	mmu_circRNA_009326	mm9_circ_009326	exonic	chr4	+	9281387	9350821	Clvs1
ASCRMP000954	0.0222301	0.101242	2.07558	up	mmu_circRNA_009810	mm9_circ_009810	intragenic	chr16	+	94422257	94422341	Ttc3
ASCRMP000963	0.0166632	0.0911194	2.46713	up	mmu_circRNA_009939	mm9_circ_009939	antisense	chr7	+	6710890	6710974	Peg3
ASCRMP000971	0.00286915	0.0387578	5.90364	up	mmu_circRNA_010009	mm9_circ_010009	exonic	chr10	-	75684291	75700095	Cabin1
ASCRMP000986	0.00319659	0.0407413	4.0176	up	mmu_circRNA_010206	mm9_circ_010206	exonic	chr2	-	167221208	167227585	Ptgis
ASCRMP001019	0.00327158	0.0407413	2.7693	up	mmu_circRNA_010490	mm9_circ_010490	exonic	chr8	+	120553583	120553802	Gse1
ASCRMP001092	0.00435637	0.0445132	2.17856	up	mmu_circRNA_011402	mm9_circ_011402	exonic	chr4	-	142117084	142118280	Kazn
ASCRMP001095	0.00688209	0.0596198	2.44533	up	mmu_circRNA_011419	mm9_circ_011419	exonic	chr17	+	70593166	70662809	Dlgap1
ASCRMP001136	0.000735954	0.0261866	5.88195	up	mmu_circRNA_011844	mm9_circ_011844	exonic	chr7	+	139477994	139481719	Inpp5a
ASCRMP001169	0.00614052	0.0564013	2.8856	up	mmu_circRNA_012217	mm9_circ_012217	intragenic	chr6	-	38737357	38737415	Hipk2
ASCRMP001177	0.00580301	0.0550595	2.0337	up	mmu_circRNA_012298	mm9_circ_012298	exonic	chr7	-	44915840	44916470	Ap2a1
ASCRMP001185	0.0456397	0.149821	2.12016	up	mmu_circRNA_012402	mm9_circ_012402	intragenic	chr11	-	69823981	69824037	Nlgn2
ASCRMP001189	0.0130481	0.0863001	3.59529	up	mmu_circRNA_012419	mm9_circ_012419	exonic	chr7	+	125728308	125770703	D430042O09Rik
ASCRMP001277	0.000706337	0.0261866	2.15331	up	mmu_circRNA_013396	mm9_circ_013396	exonic	chr4	-	140610530	140616992	Arhgef10l
ASCRMP001342	0.0139152	0.0870584	2.70098	up	mmu_circRNA_014144	mm9_circ_014144	exonic	chr8	+	108856721	108856953	Zfhx3
ASCRMP001359	0.0201893	0.0981152	2.02871	up	mmu_circRNA_014320	mm9_circ_014320	intragenic	chr17	-	39844161	39844293	XLOC_010800
ASCRMP001381	0.00344754	0.0410102	2.39116	up	mmu_circRNA_014583	mm9_circ_014583	exonic	chr4	-	129595058	129595413	Eif3i
ASCRMP001400	0.00924362	0.0744158	2.04412	up	mmu_circRNA_014776	mm9_circ_014776	exonic	chr7	+	134874057	134876315	Dock1
ASCRMP001401	0.00155984	0.0277572	5.71512	up	mmu_circRNA_014778	mm9_circ_014778	antisense	chr7	+	16915812	16915906	Calm3
ASCRMP001402	0.000886533	0.0266893	8.91704	up	mmu_circRNA_014781	mm9_circ_014781	exonic	chr1	-	22346292	22397563	Rims1
ASCRMP001406	0.00146185	0.0270952	2.30456	up	mmu_circRNA_014820	mm9_circ_014820	exonic	chr7	-	130241199	130242644	Fgfr2
ASCRMP001443	0.0336281	0.125829	2.24284	up	mmu_circRNA_015214	mm9_circ_015214	intronic	chr17	-	39845455	39845519	XLOC_010800
ASCRMP001453	0.013288	0.0868077	2.15171	up	mmu_circRNA_015273	mm9_circ_015273	intragenic	chr17	+	39845502	39845553	Rn45s
ASCRMP001468	0.00403883	0.0429193	3.69101	up	mmu_circRNA_015474	mm9_circ_015474	antisense	chr19	+	60766417	60766477	Eif3a
ASCRMP001489	0.0326336	0.123852	2.54086	up	mmu_circRNA_015690	mm9_circ_015690	intragenic	chr13	+	23764169	23764226	Hist1h1a
ASCRMP001491	0.0105755	0.0770807	3.81557	up	mmu_circRNA_015717	mm9_circ_015717	exonic	chr15	+	69013357	69049461	Khdrbs3
ASCRMP001664	0.017204	0.0919014	2.05795	up	mmu_circRNA_017648	mm9_circ_017648	exonic	chr9	+	120432352	120441581	Myrip
ASCRMP001791	0.00267395	0.0371386	7.23013	up	mmu_circRNA_018870	mm9_circ_018870	intronic	chr19	+	5797798	5797857	Gm20417

## Sheet: Down-regulation
# Fold Change cut-off: 2.0 # P-value cut-off: 0.05 # Condition pairs: db/db_vs_db/m # Column A: probeID it represents probe name. # Column B: P-value, P-value calculated from unpaired t-test. # Column C: FDR, FDR is calculated from Benjamini Hochberg FDR. # Column D: FC (abs), the absolute ratio (no log scale) of normalized intensities between two conditions. # Column E: Regulation, it depicts wh…
db/db vs_db/m 2.0 fold down regulated CircRNAs
	P-value and FDR		Fold change and Regulation		Annotations
probeID	P-value	FDR	FC (abs)	Regulation	circRNA	Alias	circRNA_type	chrom	strand	txStart	txEnd	GeneSymbol
ASCRMP000072	0.00103559	0.0266893	2.91613	down	mmu_circRNA_000727	mm9_circ_000727	exonic	chr1	-	153482741	153483872	Dhx9
ASCRMP000077	0.000126361	0.0162491	2.66022	down	mmu_circRNA_000741	mm9_circ_000741	exonic	chr10	-	25220610	25289730	Akap7
ASCRMP000090	0.0166919	0.0911194	3.15885	down	mmu_circRNA_000890	mm9_circ_000890	exonic	chr15	-	82825230	82857284	Tcf20
ASCRMP000092	0.000167051	0.0162491	8.27497	down	mmu_circRNA_000903	mm9_circ_000903	exonic	chr5	-	3747020	3772787	Ankib1
ASCRMP000115	0.0128153	0.0863001	2.41734	down	mmu_circRNA_001170	mm9_circ_001170	intragenic	chr10	-	86705340	86705439	Hsp90b1
ASCRMP000117	0.0143551	0.0880078	2.31708	down	mmu_circRNA_001194	mm9_circ_001194	exonic	chr9	+	113944847	113951684	Ubp1
ASCRMP000167	0.00256841	0.0371386	4.43324	down	mmu_circRNA_001729	mm9_circ_001729	exonic	chr9	-	96591949	96611499	Rasa2
ASCRMP000183	0.019432	0.0967972	2.38722	down	mmu_circRNA_001848	mm9_circ_001848	exonic	chr11	+	70874745	70884968	Rabep1
ASCRMP000202	0.00791952	0.0657935	2.77559	down	mmu_circRNA_002100	mm9_circ_002100	intragenic	chr1	-	178323133	178325313	Gm16586
ASCRMP000224	0.0178662	0.0919014	4.05381	down	mmu_circRNA_002319	mm9_circ_002319	exonic	chr9	+	21569454	21575518	Carm1
ASCRMP000236	0.00141376	0.0270952	4.60932	down	mmu_circRNA_002457	mm9_circ_002457	exonic	chr5	+	65565988	65594548	Ube2k
ASCRMP000259	6.1574e-05	0.0162491	3.8691	down	mmu_circRNA_002696	mm9_circ_002696	exonic	chr2	+	31604613	31605343	Fubp3
ASCRMP000278	0.00397384	0.0427994	3.37832	down	mmu_circRNA_002913	mm9_circ_002913	intragenic	chr17	+	39843392	39843484	Rn45s
ASCRMP000316	0.00123231	0.0266893	14.3933	down	mmu_circRNA_003191	mm9_circ_003191	intronic	chr19	-	5800853	5800910	TUname63656
ASCRMP000324	0.00265293	0.0371386	2.50596	down	mmu_circRNA_003237	mm9_circ_003237	exonic	chr7	+	120891595	120892053	Eef2k
ASCRMP000363	0.0284196	0.113834	2.93965	down	mmu_circRNA_003780	mm9_circ_003780	exonic	chr13	+	35815908	35816575	Cdyl
ASCRMP000394	0.0399724	0.138798	6.61979	down	mmu_circRNA_004122	mm9_circ_004122	exonic	chr17	+	26739542	26743131	Crebrf
ASCRMP000433	0.0195692	0.0968467	3.94628	down	mmu_circRNA_004501	mm9_circ_004501	exonic	chr9	-	65794621	65795495	Zfp609
ASCRMP000442	0.00214625	0.0349095	3.1212	down	mmu_circRNA_004579	mm9_circ_004579	exonic	chr9	-	59412424	59436915	Arih1
ASCRMP000467	0.0320793	0.122331	2.13966	down	mmu_circRNA_004868	mm9_circ_004868	exonic	chr10	-	12439626	12455564	Utrn
ASCRMP000519	0.0105518	0.0770807	4.41599	down	mmu_circRNA_005340	mm9_circ_005340	exonic	chr10	+	90914695	90948672	Anks1b
ASCRMP000522	0.016377	0.090642	4.08197	down	mmu_circRNA_005369	mm9_circ_005369	exonic	chr14	+	87472075	87487287	Tdrd3
ASCRMP000531	0.0265142	0.110061	2.24253	down	mmu_circRNA_005474	mm9_circ_005474	exonic	chr11	-	20725684	20727639	Aftph
ASCRMP000553	0.0217205	0.101242	3.06518	down	mmu_circRNA_005749	mm9_circ_005749	exonic	chr8	+	123382526	123383443	Tcf25
ASCRMP000572	0.00360112	0.041094	2.14002	down	mmu_circRNA_005921	mm9_circ_005921	exonic	chr2	-	37961640	38021466	Dennd1a
ASCRMP000611	0.00701234	0.060095	2.37321	down	mmu_circRNA_006355	mm9_circ_006355	exonic	chr6	-	27363084	27364020	Grm8
ASCRMP000629	0.000624594	0.0248901	2.30926	down	mmu_circRNA_006562	mm9_circ_006562	intragenic	chr10	-	128585091	128586211	Erbb3
ASCRMP000647	0.00481319	0.0479514	2.00187	down	mmu_circRNA_006735	mm9_circ_006735	intragenic	chr17	+	39843372	39843457	Rn45s
ASCRMP000682	0.0296802	0.116528	2.85388	down	mmu_circRNA_007087	mm9_circ_007087	exonic	chr16	+	32950291	32961744	Lrch3
ASCRMP000706	0.0365645	0.132463	2.36971	down	mmu_circRNA_007354	mm9_circ_007354	exonic	chr14	+	25572019	25581673	Zmiz1
ASCRMP000711	0.00240383	0.0371386	2.54117	down	mmu_circRNA_007371	mm9_circ_007371	exonic	chr9	+	100705152	100803354	Stag1
ASCRMP000712	0.000478334	0.0235406	2.3171	down	mmu_circRNA_007376	mm9_circ_007376	exonic	chr18	-	6049276	6064421	Arhgap12
ASCRMP000752	0.0194323	0.0967972	2.48161	down	mmu_circRNA_007731	mm9_circ_007731	exonic	chr15	-	81382979	81392322	St13
ASCRMP000762	0.00112887	0.0266893	3.08068	down	mmu_circRNA_007796	mm9_circ_007796	exonic	chr9	+	100705152	100738142	Stag1
ASCRMP000779	0.00310375	0.0407413	2.15785	down	mmu_circRNA_007990	mm9_circ_007990	exonic	chr7	+	112759383	112759639	Tead1
ASCRMP000781	0.00018349	0.0162491	6.73892	down	mmu_circRNA_008009	mm9_circ_008009	intronic	chr17	+	6137210	6139156	Tulp4
ASCRMP000786	0.00138178	0.0270952	4.50545	down	mmu_circRNA_008051	mm9_circ_008051	intragenic	chr17	+	39843405	39843474	Rn45s
ASCRMP000787	0.000154897	0.0162491	5.4116	down	mmu_circRNA_008057	mm9_circ_008057	exonic	chr9	-	66540061	66566903	Usp3
ASCRMP000791	0.00048325	0.0235406	7.60204	down	mmu_circRNA_008117	mm9_circ_008117	exonic	chr7	+	121052086	121057399	Mettl9
ASCRMP000802	0.0012226	0.0266893	2.05822	down	mmu_circRNA_008266	mm9_circ_008266	exonic	chr19	+	56570415	56576284	Nhlrc2
ASCRMP000809	0.0147667	0.0882551	2.29396	down	mmu_circRNA_008347	mm9_circ_008347	antisense	chr19	+	5796703	5796811	Malat1
ASCRMP000840	0.0170649	0.0919014	2.32006	down	mmu_circRNA_008691	mm9_circ_008691	exonic	chr13	+	18810431	18814293	Vps41
ASCRMP000902	0.000788556	0.0261866	3.94253	down	mmu_circRNA_009295	mm9_circ_009295	exonic	chr1	+	165478220	165479578	Mpc2
ASCRMP000916	0.00269667	0.0371386	2.10917	down	mmu_circRNA_009396	mm9_circ_009396	exonic	chr6	+	31418930	31433131	Mkln1
ASCRMP000942	0.000152276	0.0162491	10.4342	down	mmu_circRNA_009696	mm9_circ_009696	intronic	chr19	-	5796700	5796776	Malat1
ASCRMP000944	0.000311071	0.0206603	8.17539	down	mmu_circRNA_009705	mm9_circ_009705	exonic	chr7	+	121047837	121057399	Mettl9
ASCRMP000947	0.0219702	0.101242	2.63692	down	mmu_circRNA_009724	mm9_circ_009724	exonic	chr8	+	85935407	85970997	Phkb
ASCRMP000979	0.00841923	0.0684707	2.63973	down	mmu_circRNA_010094	mm9_circ_010094	exonic	chr18	-	82664837	82682287	Zfp236
ASCRMP000982	0.00567758	0.0545184	2.73986	down	mmu_circRNA_010146	mm9_circ_010146	exonic	chr6	+	50143718	50163649	Mpp6
ASCRMP000992	0.0178562	0.0919014	2.3188	down	mmu_circRNA_010252	mm9_circ_010252	exonic	chr7	+	68003809	68004355	Igf1r
ASCRMP000999	0.0177648	0.0919014	2.17021	down	mmu_circRNA_010314	mm9_circ_010314	exonic	chr8	-	47513282	47514877	Trappc11
ASCRMP001006	0.00117432	0.0266893	3.24933	down	mmu_circRNA_010383	mm9_circ_010383	exonic	chr10	-	25267307	25289730	Akap7
ASCRMP001023	0.0292409	0.115945	2.15817	down	mmu_circRNA_010546	mm9_circ_010546	intragenic	chr1	-	36143518	36143600	Uggt1
ASCRMP001026	0.0052583	0.0517391	2.42011	down	mmu_circRNA_010567	mm9_circ_010567	exonic	chr13	-	107738371	107748363	Zswim6
ASCRMP001051	7.44337e-05	0.0162491	3.02735	down	mmu_circRNA_010964	mm9_circ_010964	intergenic	chr1	+	131573846	131574032
ASCRMP001066	0.00826369	0.0678985	4.50737	down	mmu_circRNA_011137	mm9_circ_011137	exonic	chr19	+	42562551	42564341	R3hcc1l
ASCRMP001089	0.00378425	0.0424796	4.12398	down	mmu_circRNA_011381	mm9_circ_011381	antisense	chr11	+	11932646	11932697	Grb10
ASCRMP001119	0.0039193	0.0427902	4.42666	down	mmu_circRNA_011728	mm9_circ_011728	intronic	chr19	-	5796518	5796569	Malat1
ASCRMP001160	0.00324602	0.0407413	2.69976	down	mmu_circRNA_012163	mm9_circ_012163	exonic	chr5	-	107788198	107799260	Evi5
ASCRMP001174	0.015883	0.0897785	2.62466	down	mmu_circRNA_012270	mm9_circ_012270	exonic	chr18	+	36583611	36594322	Ankhd1
ASCRMP001205	0.0196853	0.0968467	2.03432	down	mmu_circRNA_012567	mm9_circ_012567	exonic	chr4	+	130668924	130669298	Pum1
ASCRMP001274	0.000619549	0.0248901	5.73071	down	mmu_circRNA_013351	mm9_circ_013351	exonic	chr2	-	144259056	144262024	Snx5
ASCRMP001307	0.0311828	0.119484	2.7564	down	mmu_circRNA_013774	mm9_circ_013774	exonic	chr13	-	103884142	103889285	Erbb2ip
ASCRMP001318	0.0139818	0.0870584	3.02353	down	mmu_circRNA_013905	mm9_circ_013905	intronic	chr19	-	5798105	5798224	TUname63656
ASCRMP001323	0.015665	0.0895954	4.80913	down	mmu_circRNA_013935	mm9_circ_013935	intronic	chr19	-	4784723	4785567	Gm21992
ASCRMP001331	0.01503	0.0882551	3.98043	down	mmu_circRNA_014015	mm9_circ_014015	exonic	chr18	-	6111684	6115850	Arhgap12
ASCRMP001367	0.00109706	0.0266893	2.99783	down	mmu_circRNA_014403	mm9_circ_014403	intragenic	chr17	+	39843405	39843457	Rn45s
ASCRMP001486	0.0453133	0.149821	2.84568	down	mmu_circRNA_015645	mm9_circ_015645	exonic	chr17	-	66024075	66053091	Ankrd12
ASCRMP001504	0.0339099	0.126291	3.18566	down	mmu_circRNA_015986	mm9_circ_015986	exonic	chr8	-	77344639	77365160	Arhgap10
ASCRMP001515	0.0176383	0.0919014	2.13105	down	mmu_circRNA_016062	mm9_circ_016062	exonic	chr1	-	38053615	38085652	Rev1
ASCRMP001572	0.0382076	0.13707	2.11888	down	mmu_circRNA_016702	mm9_circ_016702	exonic	chr4	-	9583811	9610938	Asph
ASCRMP001577	0.0106385	0.0770807	2.75491	down	mmu_circRNA_016746	mm9_circ_016746	intragenic	chr17	+	39843372	39843448	Rn45s
ASCRMP001632	0.0248022	0.10809	3.16189	down	mmu_circRNA_017329	mm9_circ_017329	exonic	chr2	-	68390913	68410141	Stk39
ASCRMP001641	0.00787627	0.0657935	2.2735	down	mmu_circRNA_017382	mm9_circ_017382	exonic	chr4	-	84291692	84293662	Bnc2
ASCRMP001649	0.0424076	0.143216	3.04992	down	mmu_circRNA_017446	mm9_circ_017446	exonic	chr10	+	18089447	18096336	Reps1
ASCRMP001668	0.0110101	0.0790546	2.14826	down	mmu_circRNA_017669	mm9_circ_017669	exonic	chr16	+	32981827	32988481	Lrch3
ASCRMP001706	0.0130384	0.0863001	2.42849	down	mmu_circRNA_018017	mm9_circ_018017	exonic	chr5	-	148918595	148921412	Katnal1
